# Supplementary material for: Highly dispersed Co and Ni nanoparticles encapsulated in N-doped carbon nanotubes as efficient catalysts for the reduction of unsaturated oxygen compounds in aqueous phase
Source: Royal Society of Chemistry journal article supplement (doi:10.1039/c8cy01488d), 2018-01-01
Supplement: c8cy01488d1.pdf [file c8cy01488d1.pdf]

## Electronic Supplementary Information

### **Highly dispersed Co, Ni nanoparticles encapsulated in N-doped carbon nanotubes as efficient catalysts for reduction of unsaturated oxygen compounds in aqueous-phase**

Wanbing Gong,<sup>a</sup> Chun Chen,<sup>\*a</sup> Haimin Zhang,<sup>a</sup> Guozhong Wang<sup>a</sup> and Huijun Zhao<sup>\*ab</sup>

<sup>a</sup> Key Laboratory of Materials Physics, Centre for Environmental and Energy Nanomaterials, Anhui Key Laboratory of Nanomaterials and Nanotechnology, CAS Centre for Excellence in Nanoscience, Institute of Solid State Physics, Chinese Academy of Sciences, Hefei 230031, P. R. China

<sup>b</sup> Centre for Clean Environment and Energy, Gold Coast Campus, Griffith University, Queensland 4222, Australia

Address correspondence to [h.zhao@griffith.edu.au](mailto:h.zhao@griffith.edu.au); [chenchun2013@issp.ac.cn](mailto:chenchun2013@issp.ac.cn)

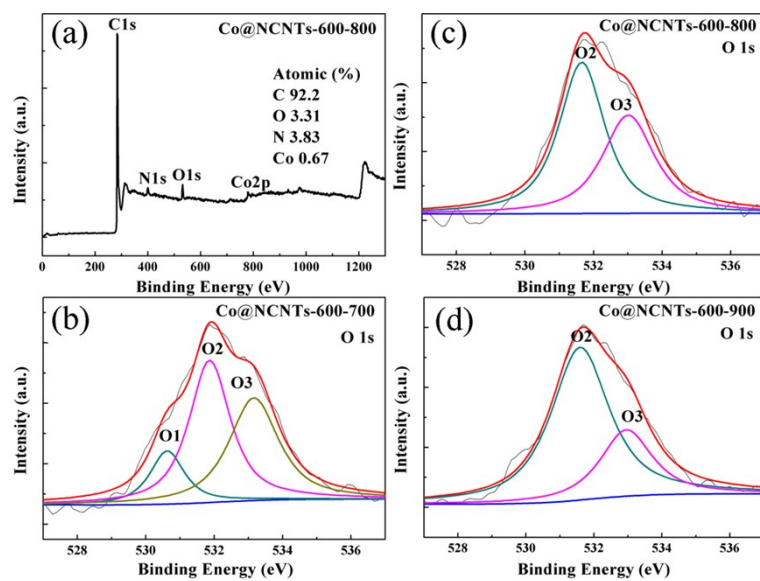

**Fig. S1** XPS survey spectrum of Co@NCNTs-600-800 (a) and O 1s spectrum (b-d) of Co@NCNTs-600-700, Co@NCNTs-600-800 and Co@NCNTs-600-900 catalysts.

**Table S1** Physicochemical characteristics of Co catalysts.

| Samples          | Content <sup>a</sup> | $S_{\text{BET}}^b$  | $V_{\text{pore}}^b$  | Particle size <sup>c</sup> | Co Species <sup>d</sup> |                  | N                    | Content of N types <sup>d</sup> |      |      |
|------------------|----------------------|---------------------|----------------------|----------------------------|-------------------------|------------------|----------------------|---------------------------------|------|------|
|                  | (wt.%)               | (m <sup>2</sup> /g) | (cm <sup>3</sup> /g) | (nm)                       | (%)                     |                  | Content <sup>d</sup> | (at.%)                          |      |      |
|                  |                      |                     |                      |                            | Co                      | CoO <sub>x</sub> |                      | N1                              | N2   | N3   |
| Co@NCNTs-600-700 | 39.4                 | 117.4               | 0.348                | 21.4                       | 24.5                    | 75.5             | 3.99                 | 59.2                            | 19.9 | 20.9 |
| Co@NCNTs-600-800 | 40.3                 | 200.7               | 0.588                | 28.6                       | 26.2                    | 73.8             | 3.83                 | 67.5                            | 0    | 32.5 |
| Co@NCNTs-600-900 | 40.8                 | 158.2               | 0.454                | 52.1                       | 38.5                    | 61.5             | 3.17                 | 43.4                            | 0    | 56.6 |

<sup>a</sup> Determined by ICP.<sup>b</sup> Calculated by N<sub>2</sub> physisorption.<sup>c</sup> Calculated by Scherrer equation.<sup>d</sup> Determined by XPS.

N1: pyridinic-N

N2: pyrrolic-N

N3: graphitic-N

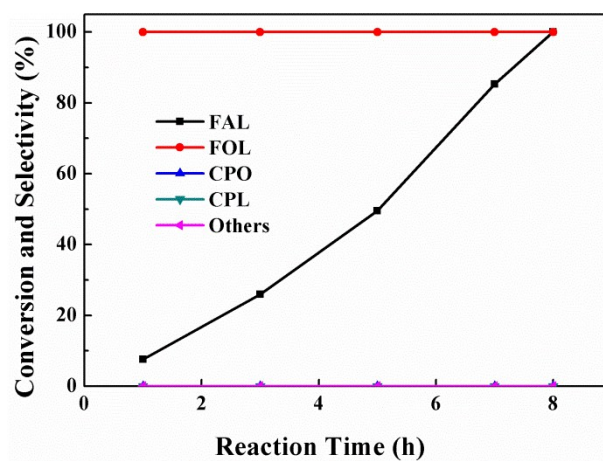

**Fig. S2** Effect of reaction time on the hydrogenation of FAL over Co@NCNTs-600-800.

Reaction conditions: Catalyst = 30 mg, FAL = 1 mmol, Water =10 mL, Reaction temperature = 80 °C, H<sub>2</sub> pressure = 4 MPa.

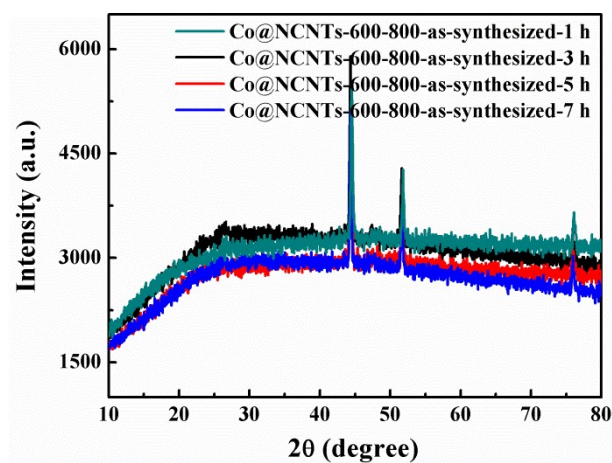

**Fig. S3** The XRD patterns of the catalyst with different reaction time. Reaction conditions: Catalyst = 30 mg, FAL = 1 mmol, Water = 10 mL, Reaction temperature = 140 °C, H<sub>2</sub> pressure = 4 MPa.

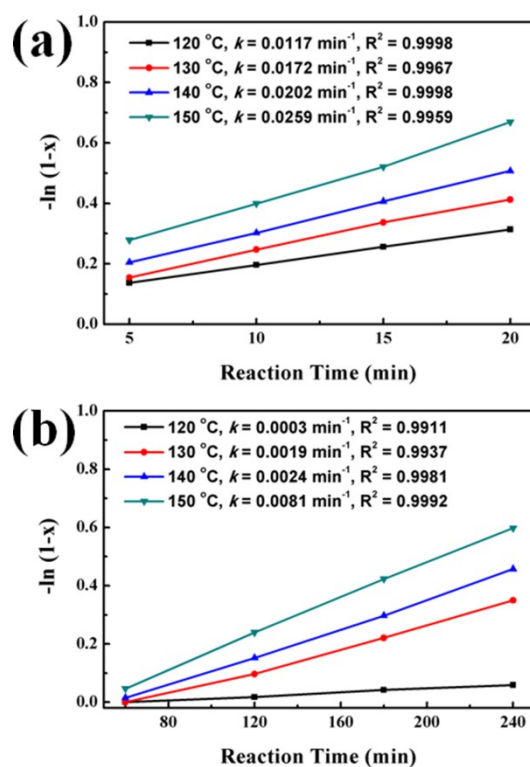

**Fig. S4** First order kinetic fit for the hydrogenation of FAL to FOL (a) and CPO (b) over Co@NCNTs-600-800 catalyst at various temperatures: Plots of  $-\ln(1-x)$  vs. time (min) to calculate rate constant  $k$ . Reaction conditions: Catalyst = 20 mg, FAL = 1 mmol, Water = 10 mL,  $H_2$  pressure = 4 MPa.

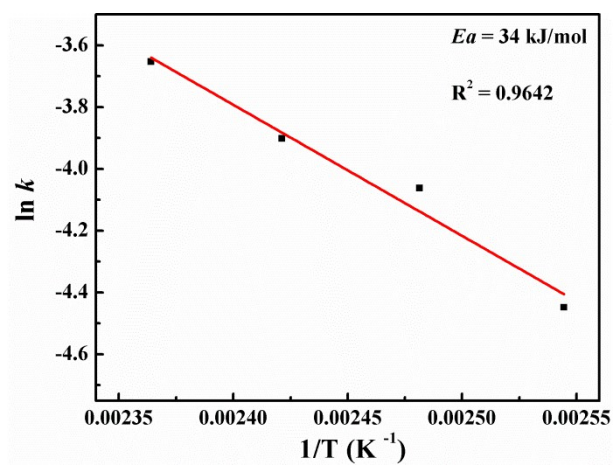

**Fig. S5** Arrhenius type plots of catalytic activity for the FAL hydrogenation over the Co@NCNTs-600-800 catalyst.

**Table S2** Catalytic performance of Co@NCNTs-600-800 in FAL hydrogenation<sup>a</sup>

| Run. no. | Temperature<br>(°C) | FAL conversion (%) | TOF <sup>b</sup> (h <sup>-1</sup> ) |
|----------|---------------------|--------------------|-------------------------------------|
| 1        | 120                 | 17.8               | 231                                 |
| 2        | 130                 | 21.9               | 285                                 |
| 3        | 140                 | 26.1               | 339                                 |
| 4        | 150                 | 32.9               | 428                                 |

<sup>a</sup> Catalyst = 20 mg, FAL = 1 mmol, Water =10 mL, H<sub>2</sub> pressure = 4 MPa, Reaction time = 0.16 h.

<sup>b</sup> Turnover frequency (TOF) = mol<sub>converted FAL</sub>/(mol<sub>exposed surface Co</sub>·h).



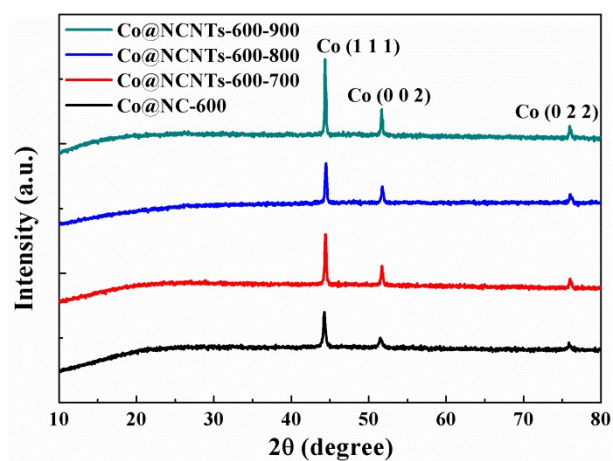

**Fig. S6** XRD patterns of Co@NC-600, Co@NCNTs-600-700, Co@NCNTs-600-800 and Co@NCNTs-600-900 catalysts.

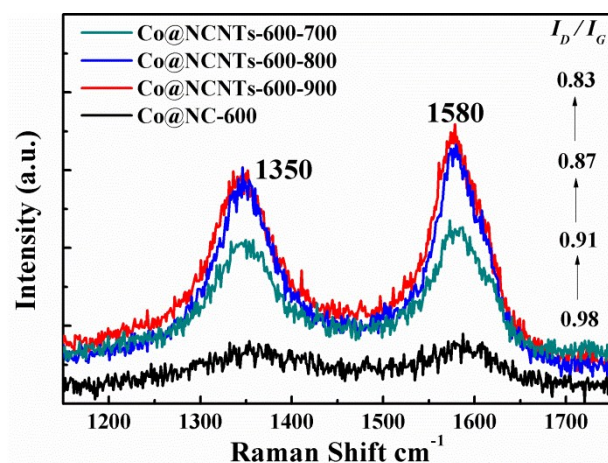

**Fig. S7** Raman spectrums of Co@NC-600, Co@NCNTs-600-700, Co@NCNTs-600-800 and Co@NCNTs-600-900 catalysts.

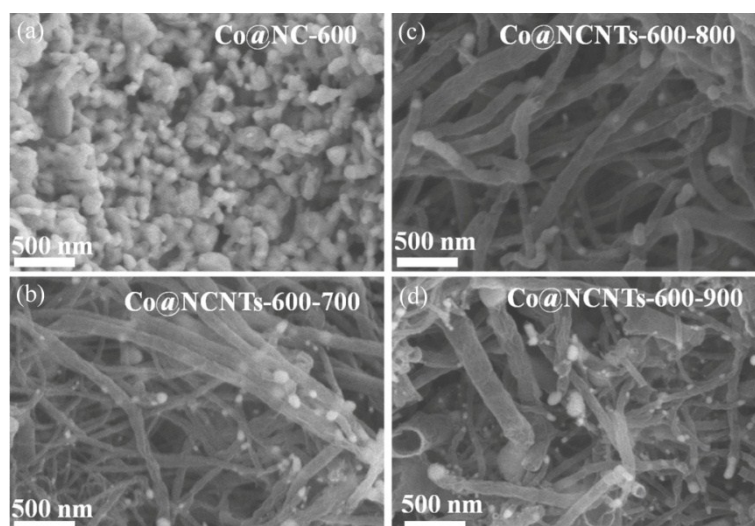

**Fig. S8** The SEM images of (a) Co@NC-600, (b) Co@NCNTs-600-700, (c) Co@NCNTs-600-800 and (d) Co@NCNTs-600-900 catalysts.

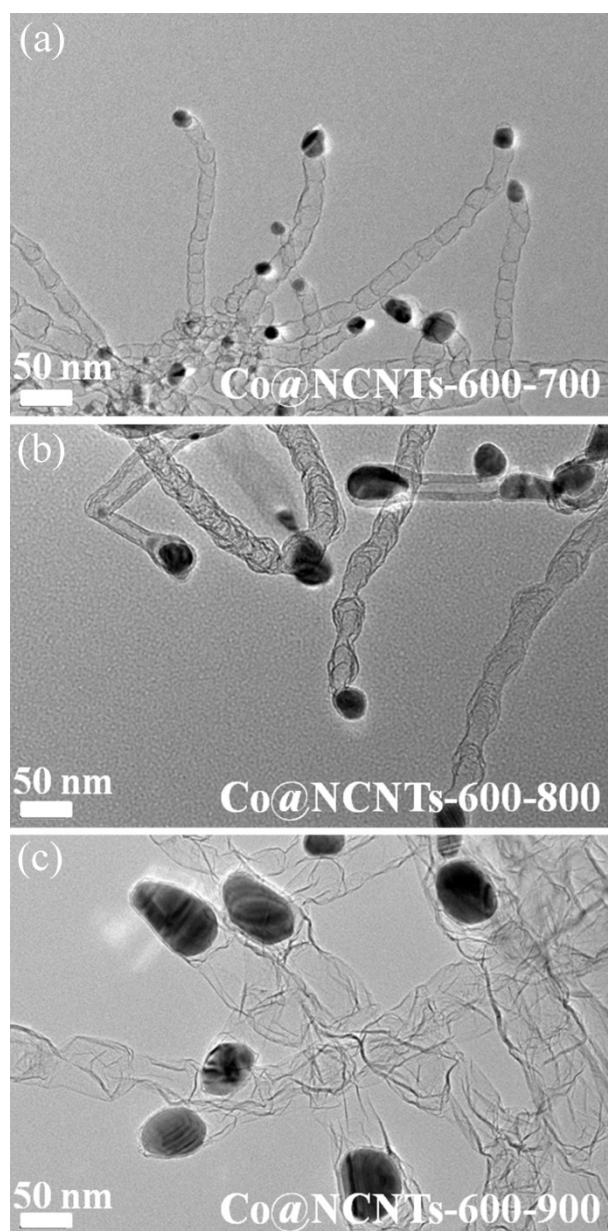

**Fig. S9** The TEM images of Co@NCNTs-600-700, Co@NCNTs-600-800 and Co@NCNTs-600-900 catalysts.

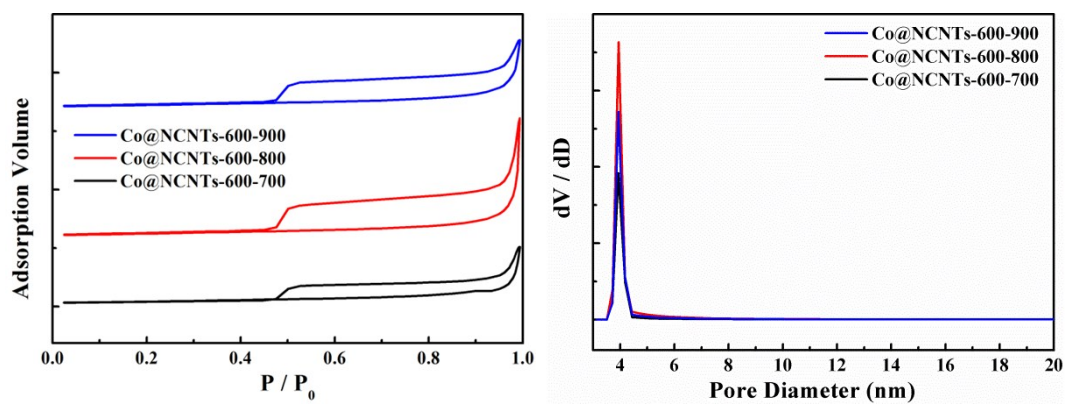

**Fig. S10**  $N_2$  adsorption–desorption isotherms (left) and BJH pore size distribution plots (right) of Co catalysts.

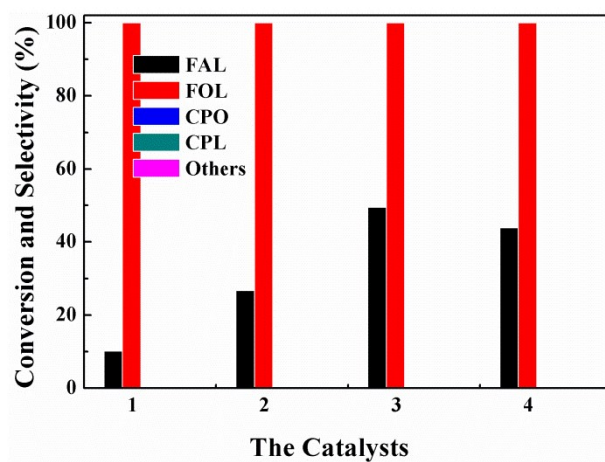

**Fig. S11** Hydrogenation of FAL over different Co catalysts. 1, Co@NC-600; 2, Co@NCNTs-600-700; 3, Co@NCNTs-600-800; 4, Co@NCNTs-600-900. Reaction conditions: Catalyst = 30 mg, FAL = 1 mmol, Water =10 mL, Reaction temperature = 80 °C, H<sub>2</sub> pressure = 4 MPa, Reaction time = 5 h.

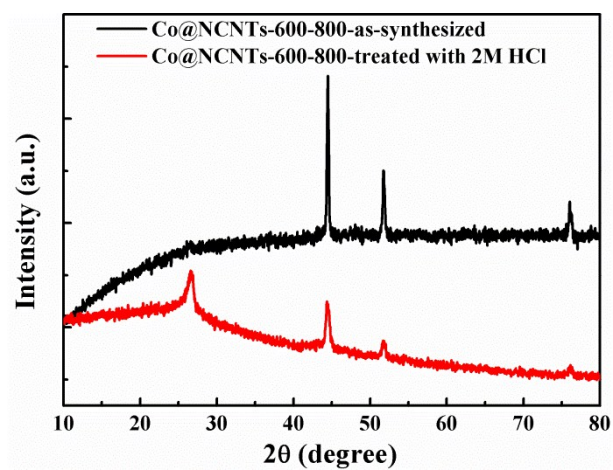

**Fig. S12** The XRD patterns of the as-synthesized and treated Co@NCNTs-600-800 catalysts.

**Table S3** Catalytic performance over the as-synthesized and treated Co@NCNTs-600-800 catalysts<sup>a</sup>

| Catalysts                       | FAL Conv. (%) | FOL Sel. (%) | CPO Sel. (%) |
|---------------------------------|---------------|--------------|--------------|
| As-synthesized Co@NCNTs-600-800 | 100           | 18.1         | 75.3         |
| Treated Co@NCNTs-600-800        | 45.6          | 81.9         | 15.6         |

<sup>a</sup> Reaction conditions: Catalyst = 30 mg, FAL = 1 mmol, Water =10 mL, Reaction temperature = 140 °C, Reaction time = 5 h, H<sub>2</sub> pressure = 4 MPa.



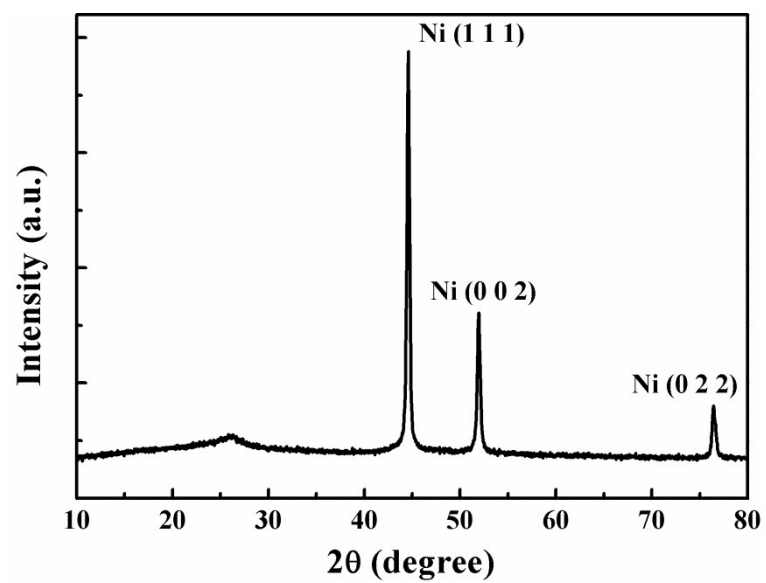

**Fig. S13** The XRD pattern of Ni@NCNTs-600-800 catalyst.

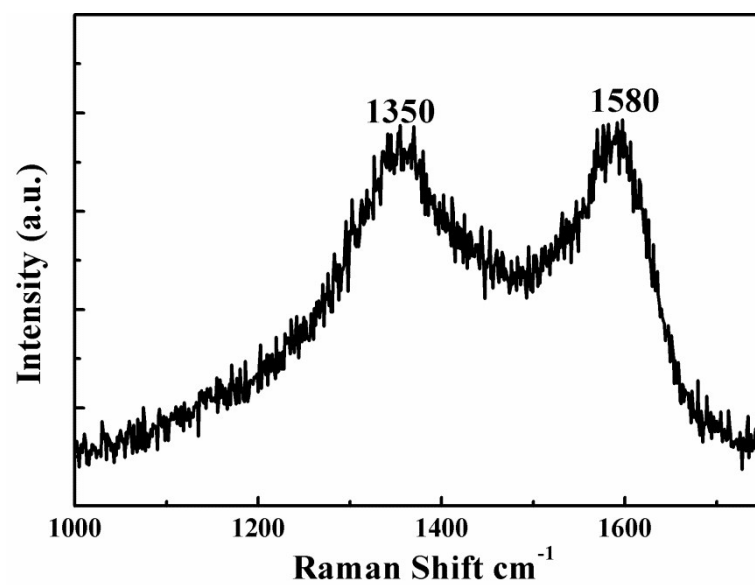

**Fig. S14** The Raman spectrum of Ni@NCNTs-600-800 catalyst.

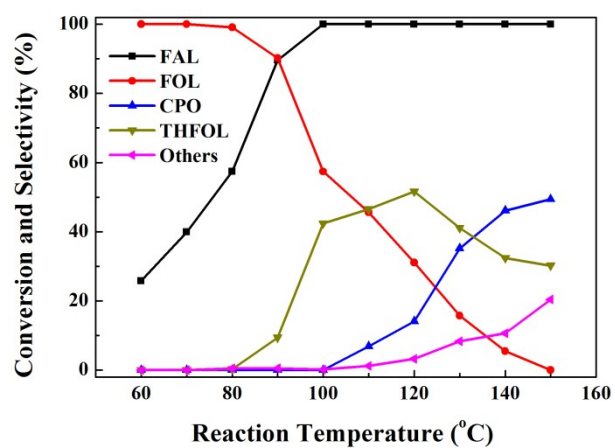

**Fig. S15** Effect of reaction temperature on the hydrogenation of FAL over Ni@NCNTs-600-800. Reaction conditions: Catalyst = 30 mg, FAL = 1 mmol, Water =10 mL, H<sub>2</sub> pressure = 4 MPa, Reaction time = 5 h.

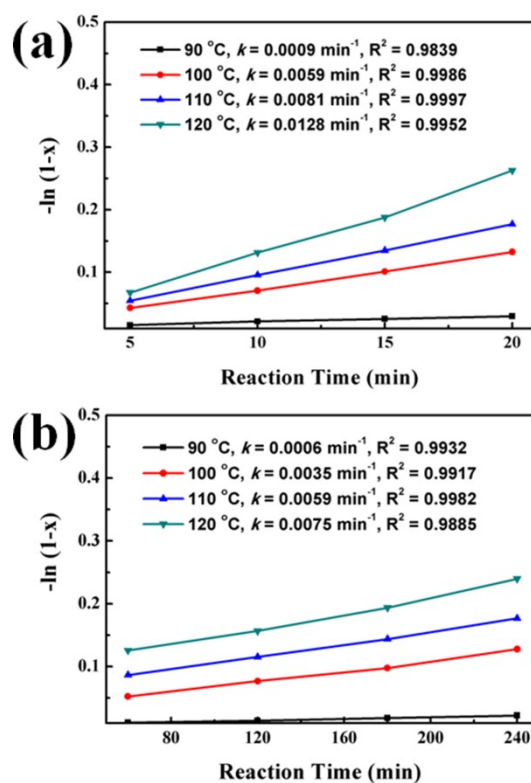

**Fig. S16** First order kinetic fit for the hydrogenation of FAL to FOL (a) and THFOL (b) over Ni@NCNTs-600-800 catalyst at various temperatures: Plots of  $-\ln(1-x)$  vs. time (min) to calculate rate constant  $k$ . Reaction conditions: Catalyst = 20 mg, FAL = 1 mmol, Water = 10 mL,  $H_2$  pressure = 4 MPa.

**Table S4** Catalytic performance of Ni@NCNTs-600-800 in FAL hydrogenation<sup>a</sup>

| Run. no. | Temperature (°C) | FAL conversion (%) | TOF <sup>b</sup> (h <sup>-1</sup> ) |
|----------|------------------|--------------------|-------------------------------------|
| 1        | 90               | 2.1                | 27                                  |
| 2        | 100              | 6.8                | 88                                  |
| 3        | 110              | 9.1                | 118                                 |
| 4        | 120              | 12.3               | 160                                 |

<sup>a</sup> Catalyst = 20 mg, FAL = 1 mmol, Water =10 mL, H<sub>2</sub> pressure = 4 MPa, Reaction time = 0.16 h.

<sup>b</sup> Turnover frequency (TOF) = mol<sub>converted FAL</sub>/(mol<sub>exposed surface Ni</sub>·h).
